# Supplementary material
Source: PubMed Central journal article supplement (PMC168982)

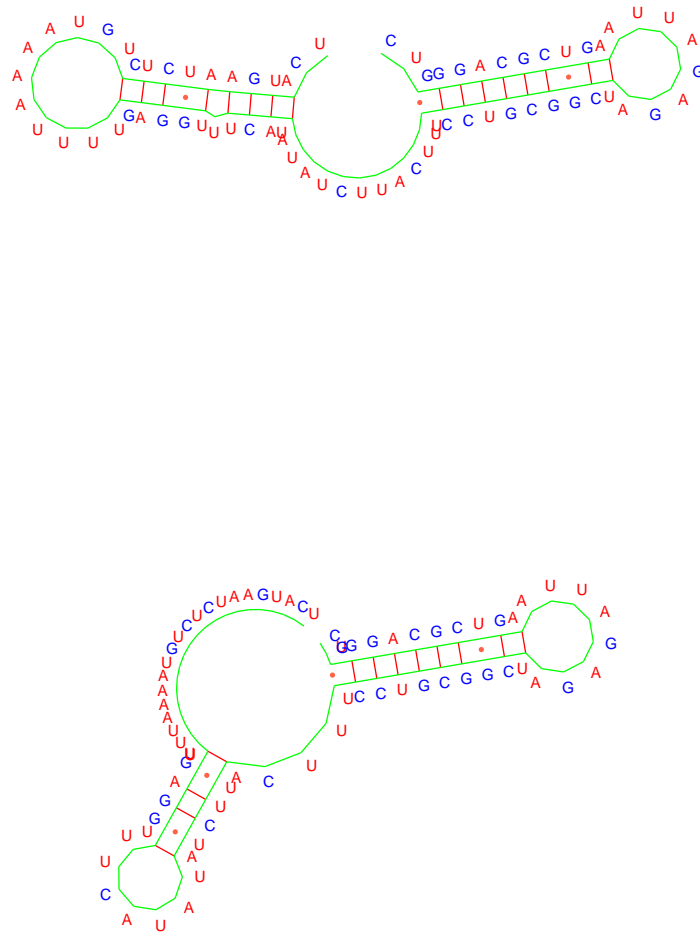

Figure S2: Two structures predicted by paRNAss for S15 mRNA of *E. coli* (X01073)

Supplement: nar_31_13_3767__1.pdf [file nar_31_13_3767__1.pdf]

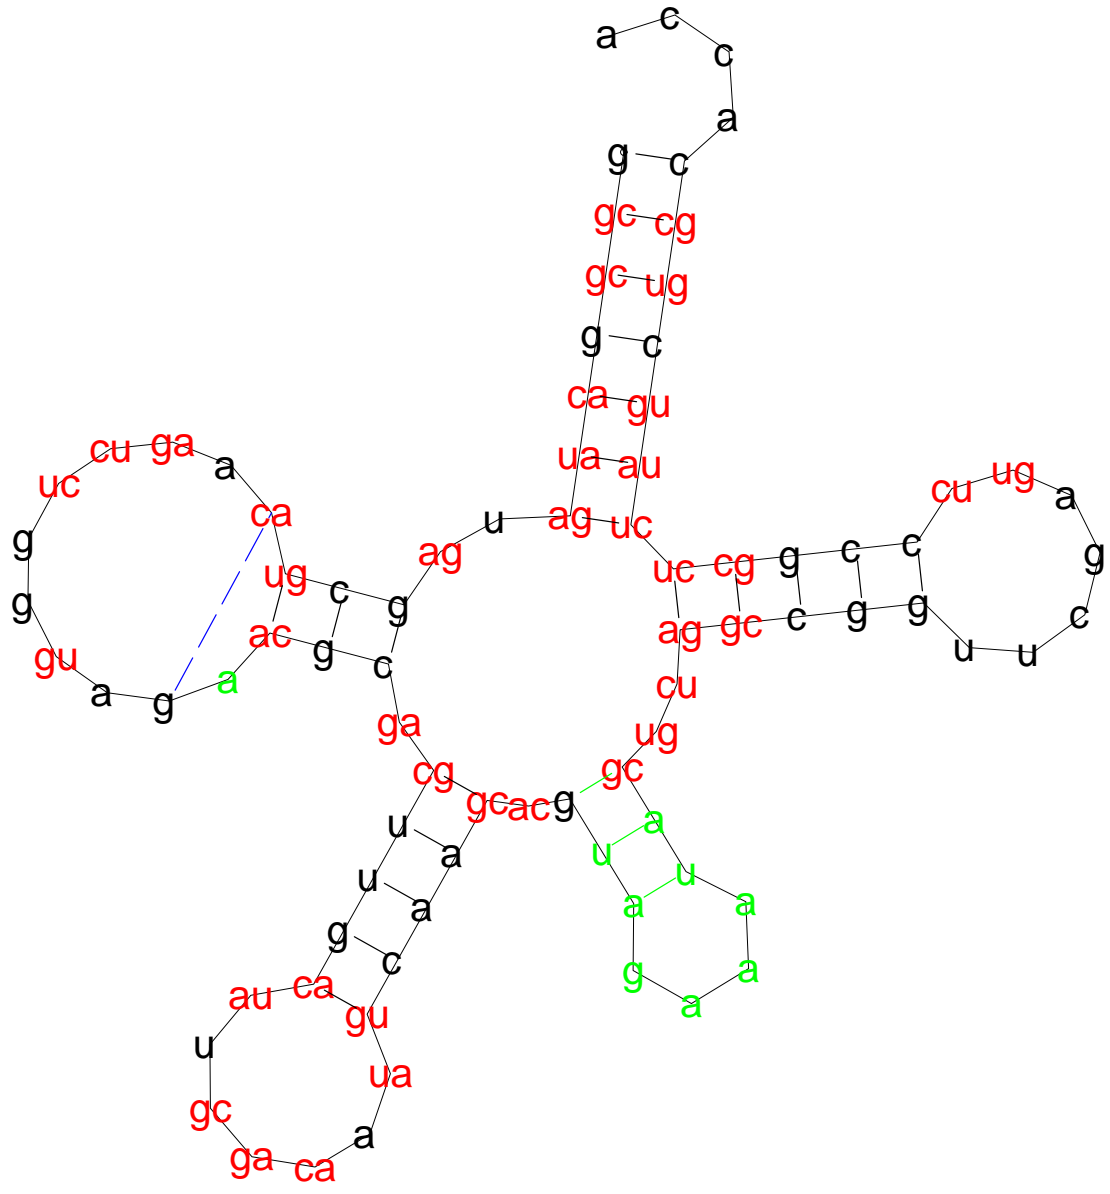

Supplement: nar_31_13_3767__2.pdf [file nar_31_13_3767__2.pdf]
